# Supplementary material for: Multiplex Detection of Biogenic Amines for Meat Freshness Monitoring Using Nanoplasmonic Colorimetric Sensor Array
Source: MDPI journal article supplement (doi:10.3390/bios13080803), 2023-08-10
Supplement: s1 [file s1]

## Supporting Information

### Multiplex Detection of Biogenic Amines for Meat Freshness Monitoring Using Nanoplasmonic Colorimetric Sensor Array

*Samira Abbasi-Moayed<sup>a\*</sup>, Afsaneh Orouji<sup>b</sup> and M. Reza Hormozi-Nezhad<sup>b,c\*</sup>*

<sup>a</sup> Department of analytical chemistry, Faculty of chemistry, Kharazmi University, 15719-14911, Tehran, Iran

<sup>b</sup> Department of Chemistry, Sharif University of Technology, Tehran, 111559516, Iran

<sup>c</sup> Institute for Nanoscience and Nanotechnology, Sharif University of Technology, Tehran, 11155-9516, Iran

\*Corresponding authors:

- M. Reza Hormozi-Nezhad, email: hormozi@sharif.edu

ORCID iD: 0000-0002-7472-1850

-Samira Abbasi-Moayed, email: s.abbasimoayed@khu.ac.ir

## Table of contents

| Content                                                                                                                                                                                                                           | Page |
|-----------------------------------------------------------------------------------------------------------------------------------------------------------------------------------------------------------------------------------|------|
| <b>Figure S1.</b> The UV-Vis spectra and corresponding TEM images of prepared AuNPs (a, b) and AgNPs (c, d)                                                                                                                       | S3   |
| <b>Figure S2.</b> The absorption spectra of AuNPs in the presence of 2.0 $\mu\text{M}$ of target BAs at three different pH regimes (a) pH 4.5 (b) pH 6.5 (c) pH 8.5                                                               | S4   |
| <b>Figure S3.</b> The absorption spectra of AgNPs in the presence of 2.0 $\mu\text{M}$ of target BAs at three different pH regimes (a) pH 4.5 (b) pH 6.5 (c) pH 8.5                                                               | S5   |
| <b>Figure S4.</b> The absorption spectra of AuNPs in the presence of target BAs (2.0 $\mu\text{M}$ ) after 21 minutes (time interval between each step is 2 minute)                                                               | S6   |
| <b>Figure S5.</b> The absorption spectra of AgNPs in the presence of target BAs (2.0 $\mu\text{M}$ ) after 21 minutes (time interval between each step is 2 minute)                                                               | S7   |
| <b>Figure S6.</b> The kinetic behavior aggregation response vs time) of (A) AuNPs (SE1) and (B) AgNPs (SE2) in the presence of SP, SD, HS and TP at concentration of 2.0 $\mu\text{M}$ at pH 6.2 (citrate buffer, 1.0 mM)         | S8   |
| <b>Figure S7.</b> The absorption spectra of AuNPs in the presence of different concentration of (A) Spermine, (B) Spermidine, (C) Tryptamine and (D) Histamine (optimum conditions: citrate buffer (pH 6.5, 1.0 mM), time 10 min) | S9   |
| <b>Figure S8.</b> The absorption spectra of AgNPs in the presence of different concentration of (A) Spermine, (B) Spermidine, (C) Tryptamine and (D) Histamine (optimum conditions: citrate buffer (pH 6.5, 1.0 mM), time 10 min) | S10  |
| <b>Table S2.</b> Jackknife results of LDA on the training set                                                                                                                                                                     | S11  |
| <b>Figure S9.</b> Three-dimensional (3D) score plot of PCA-LDA for discrimination between different concentration (0.1-10.0 $\mu\text{M}$ )                                                                                       | S12  |
| <b>Figure S10.</b> The absorption spectra of (a) AuNPs and (b) AgNPs in the presence of meat matrix (blank) and meat contaminated with SP, SD, TP and HS.                                                                         | S13  |

**Table S3.** Identification of unknown BAs in meat sample using PCA-LDA (PCA-LDA was performed on the colorimetric responses of the training set and the meat sample (as the test set). The Mahalanobis distance of the unknown samples from the centroid of the training groups was calculated and used for class identification). **S14**

**Table S1.** Comparison of the proposed methods with a number reported colorimetric methods for BAs detection.

| Analyte                | Probe                         | Mechanism   | Linear range ( $\mu\text{M}$ ) | LOD ( $\mu\text{M}$ ) | Real Sample | Reference |
|------------------------|-------------------------------|-------------|--------------------------------|-----------------------|-------------|-----------|
| Histamine              | AuNPs                         | Aggregation | 0.1-2.1                        | 0.04                  | Salmon fish | [1]       |
| Histamine              | AuNPs                         | Aggregation | 2.0-16.0                       | 0.6                   | Chicken     | [2]       |
| Histamine              | AuNPs                         | Aggregation | 0.2-0.4                        | 0.2                   | Wine        | [3]       |
| Histamine              | AuNPs                         | Growth      | 9.0-90.0                       | 25.2                  | Shrimp      | [4]       |
| Spermine               | AuNPs                         | Aggregation | 0.1-2.0                        | 0.01                  | Beef        | [5]       |
| Spermine               | hydroxyl pillar[5]arene/AuNPs | Aggregation | 0.1-4.0                        | 0.03                  | -           | [6]       |
| Spermine               | AuNPs                         | Aggregation | 0.03-0.07                      | 0.05                  | Human Urine | [7]       |
| Spermine               | 6-azo-2-thiothymine/AgNPs     | Aggregation | 2.5-20                         | 0.23                  | Urine       | [8]       |
| <b>Spermine</b>        | AuNRs and AuNPs               | Growth      | 20-800                         | 4.7                   | Salmon fish | [9]       |
| <b>Tryptamine</b>      |                               |             | 40-800                         | 8.6                   |             |           |
| <b>Ethylenediamine</b> |                               |             | 60-800                         | 10.1                  |             |           |
| <b>Tyramine</b>        |                               |             | 80-800                         | 27.3                  |             |           |
| <b>Spermidine</b>      |                               |             | 10-800                         | 2.5                   |             |           |
| Histamine              |                               |             | 40-800                         | 14.3                  |             |           |
| Spermine               | AuNPs and AgNPs               | Aggregation | 0.1-10                         | 0.3                   | Meat        | This work |
| <b>Spermidine</b>      |                               |             |                                | 0.2                   |             |           |
| <b>Tryptamine</b>      |                               |             |                                | 0.1                   |             |           |
| Histamine              |                               |             |                                | 0.2                   |             |           |

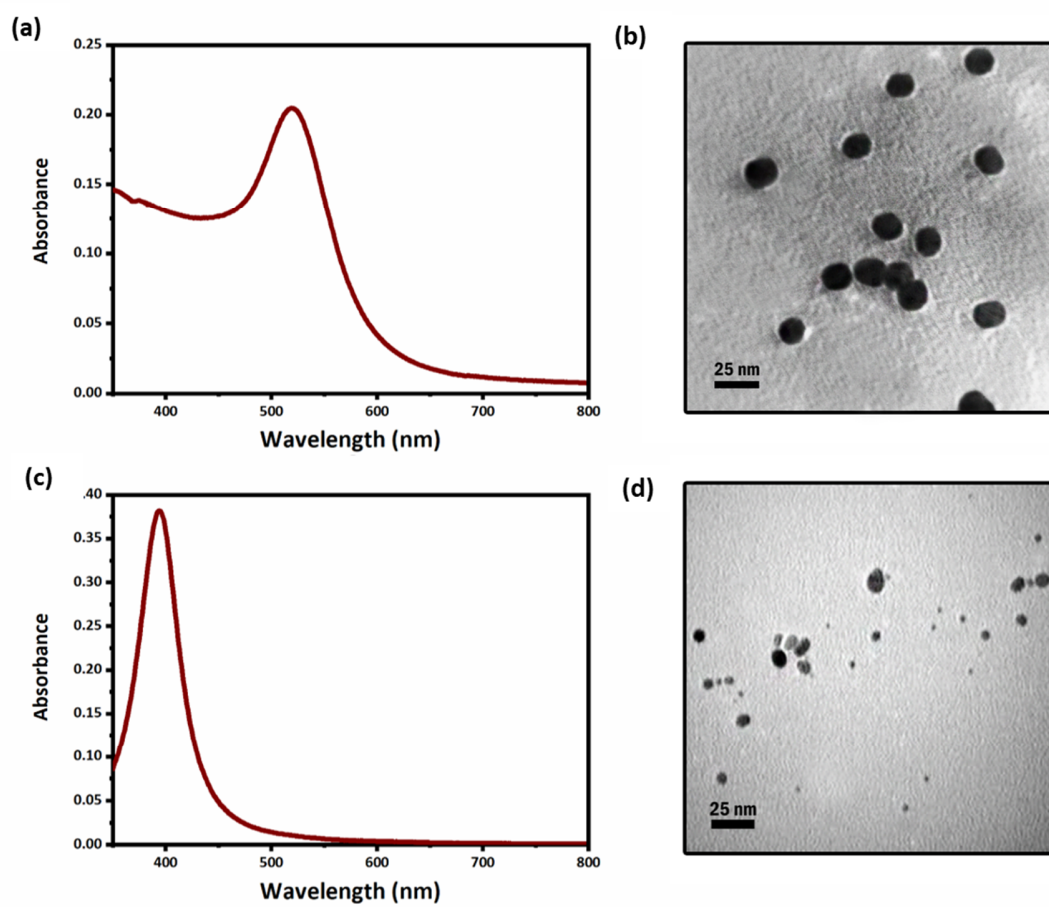

**Figure S1.** The UV-Vis spectra and corresponding TEM images of prepared AuNPs (a, b) and AgNPs (c, d).

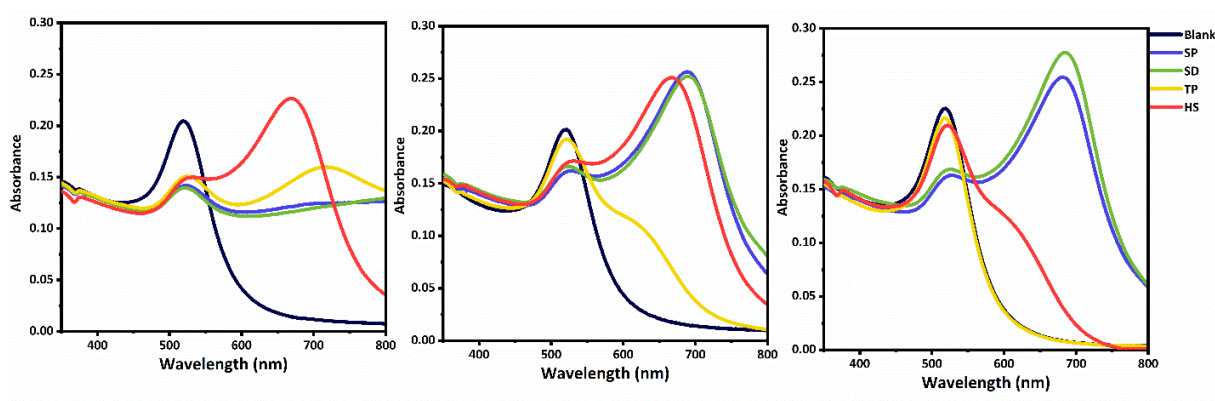

**Figure S2.** The absorption spectra of AuNPs in the presence of 2.0  $\mu\text{M}$  of target BAs at three different pH regimes (a) pH 4.5 (b) pH 6.5 (c) pH 8.5.

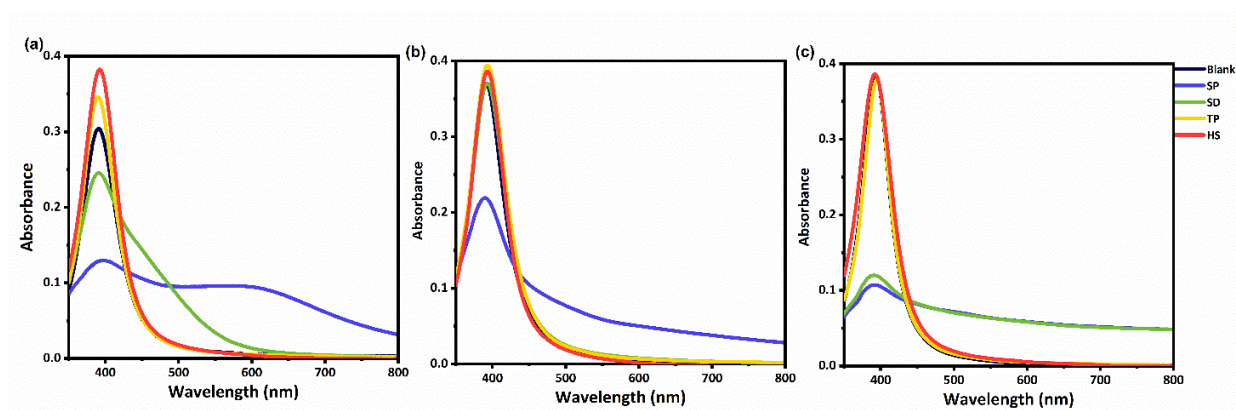

**Figure S3.** The absorption spectra of AgNPs in the presence of 2.0  $\mu\text{M}$  of target BAs at three different pH regimes (a) pH 4.5 (b) pH 6.5 (c) pH 8.5.

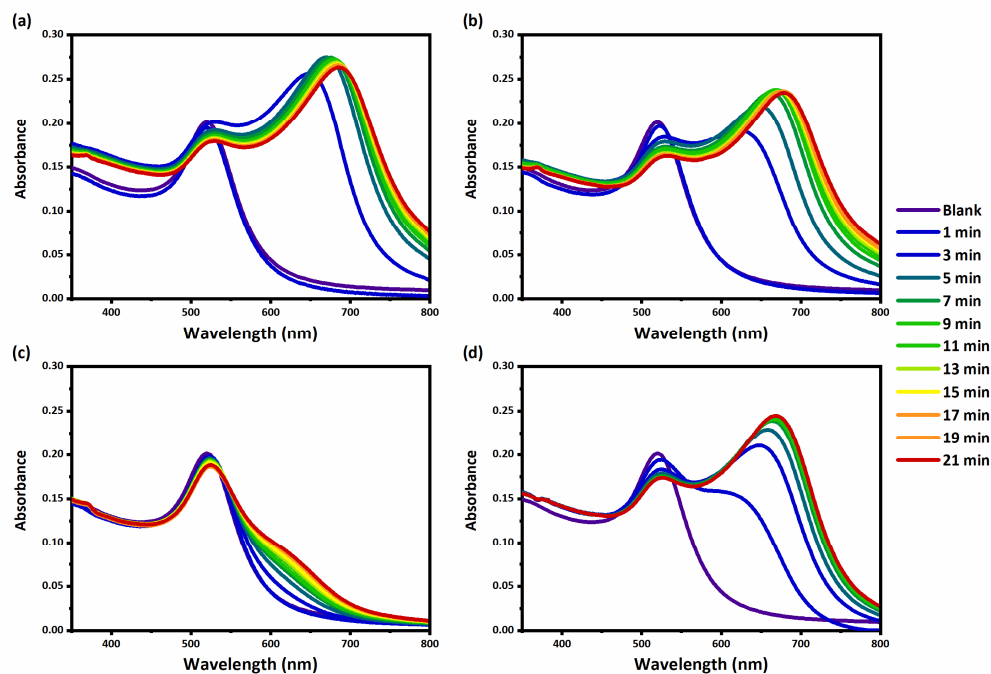

**Figure S4.** The absorption spectra of AuNPs in the presence of (a) SP (b) SD (c) TP and (d) HS at the concentration of 2.0  $\mu\text{M}$  after 21 minutes (time interval between each step is 2 minute).

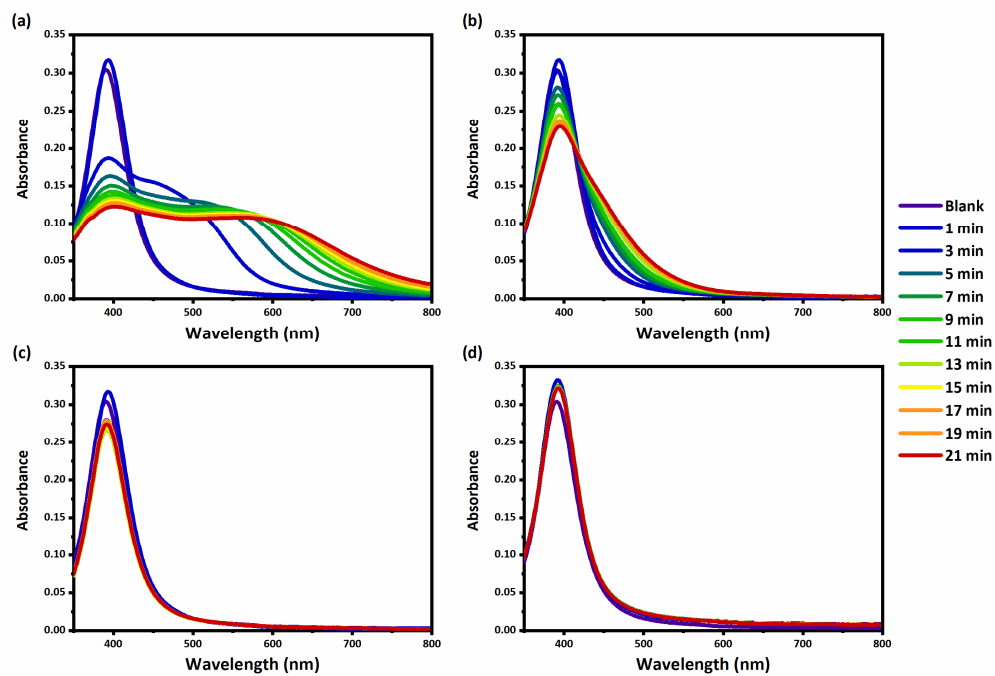

**Figure S5.** The absorption spectra of AgNPs in the presence of (a) SP (b) SD (c) TP and (d) HS at the concentration of 2.0  $\mu\text{M}$  after 21 minutes (time interval between each step is 2 minute).



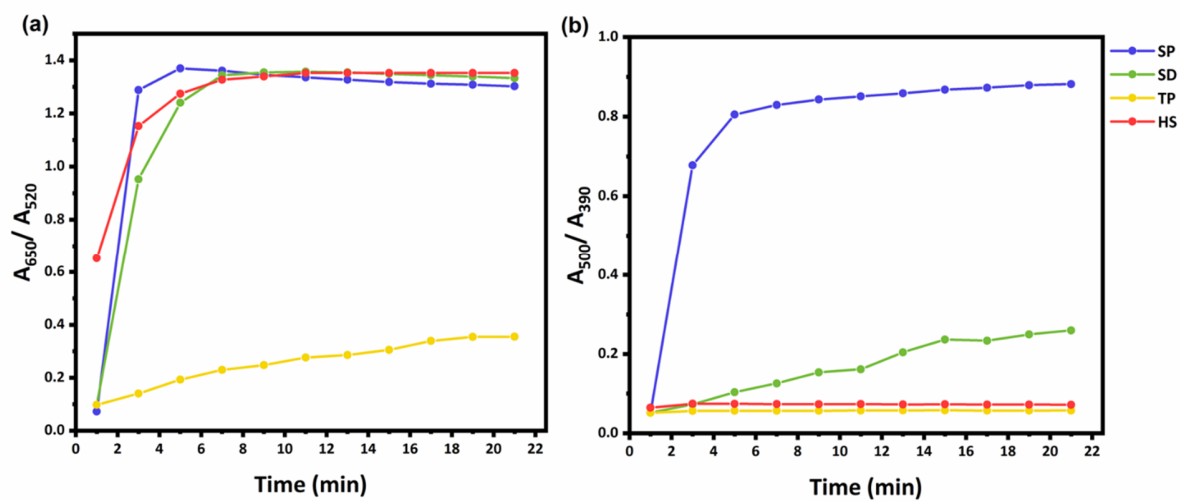

**Figure S6.** The kinetic behavior aggregation response vs time) of (A) AuNPs (SE1) and (B) AgNPs (SE2) in the presence of SP, SD, HS and TP at concentration of 2.0  $\mu\text{M}$  at pH 6.2 (citrate buffer, 1.0 mM).

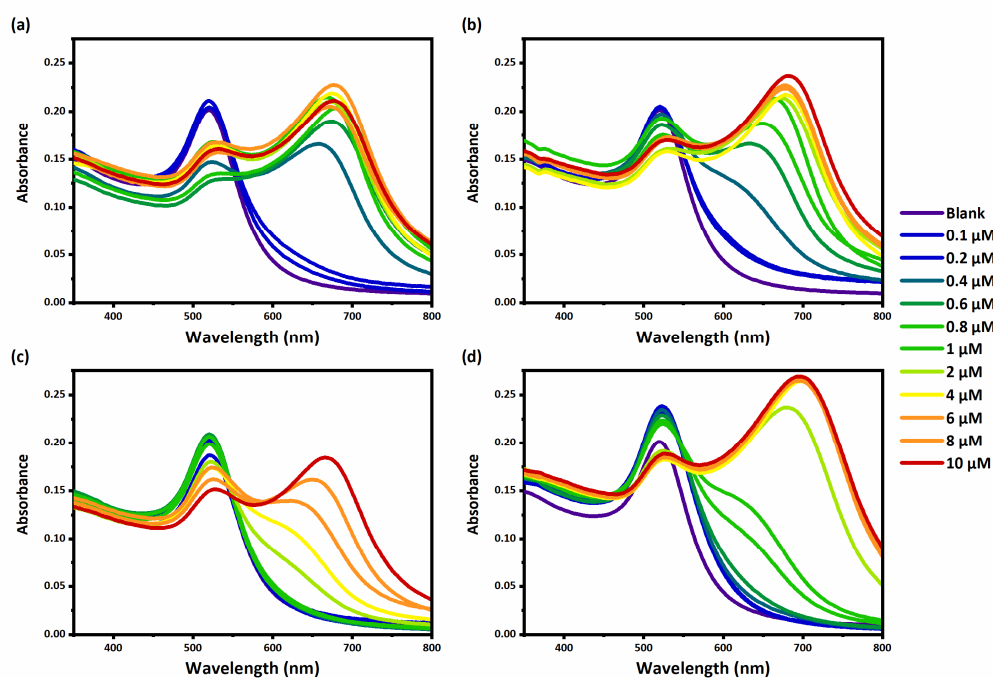

**Figure S7.** The absorption spectra of AuNPs in the presence of different concentration of (A) Spermine, (B) Spermidine, (C) Tryptamine and (D) Histamine (optimum conditions: citrate buffer (pH 6.5, 1.0 mM), time 10 min).

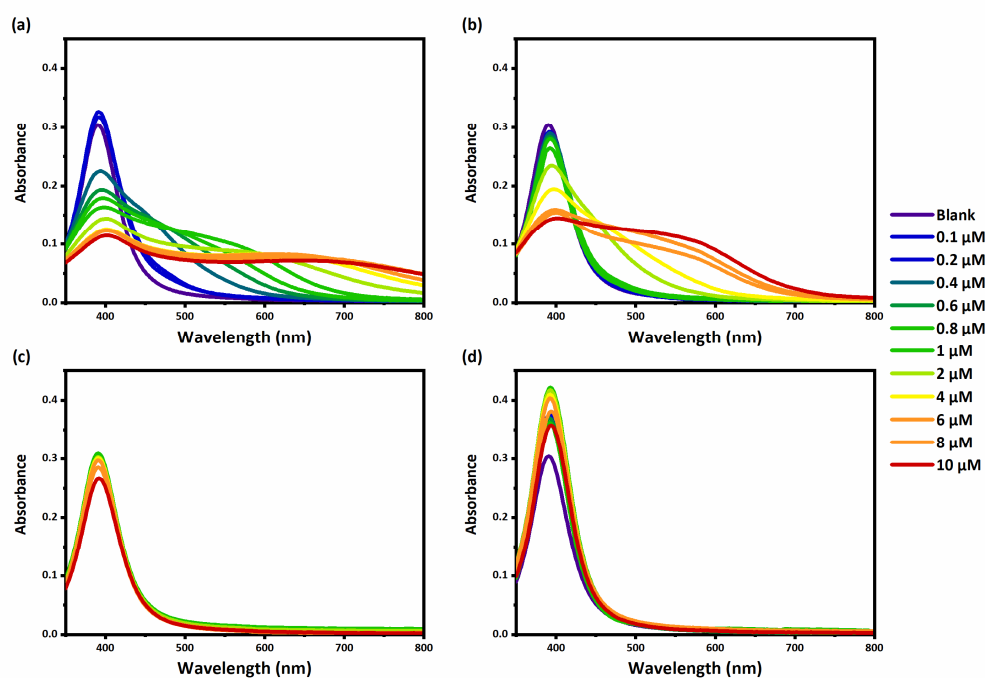

**Figure S8.** The absorption spectra of AgNPs in the presence of different concentration of (A) Spermine, (B) Spermidine, (C) Tryptamine and (D) Histamine (optimum conditions: citrate buffer ( pH 6.5, 1.0 mM), time 10 min).

**Table S2.** Jackknife results of LDA on the training set.

|              |         | Predicted Class |        |        |        |         |        |
|--------------|---------|-----------------|--------|--------|--------|---------|--------|
|              |         | SP              | SD     | TP     | HS     | Mixture | Total  |
| Actual Class | SP      | 33              | 0      | 0      | 0      | 0       | 33     |
|              |         | 100.0%          | 0.00%  | 0.00%  | 0.00%  | 0.00%   | 100.0% |
|              | SD      | 0               | 33     | 0      | 0      | 0       | 33     |
|              |         | 0.00%           | 100.0% | 0.00%  | 0.00%  | 0.00%   | 100.0% |
|              | TP      | 0               | 0      | 33     | 0      | 0       | 33     |
|              |         | 0.00%           | 0.00%  | 100.0% | 0.00%  | 0.00%   | 100.0% |
|              | HS      | 0               | 0      | 0      | 33     | 0       | 33     |
|              |         | 0.00%           | 0.00%  | 0.00%  | 100.0% | 0.00%   | 100.0% |
|              | Mixture | 0               | 0      | 0      | 0      | 24      | 24     |
|              |         | 0.00%           | 0.00%  | 0.00%  | 0.00%  | 100.0%  | 100.0% |
|              | Total   | 33              | 33     | 33     | 33     | 24      | 156    |
|              |         | 21.15%          | 21.15% | 21.15% | 21.15% | 15.4%   | 100.0% |

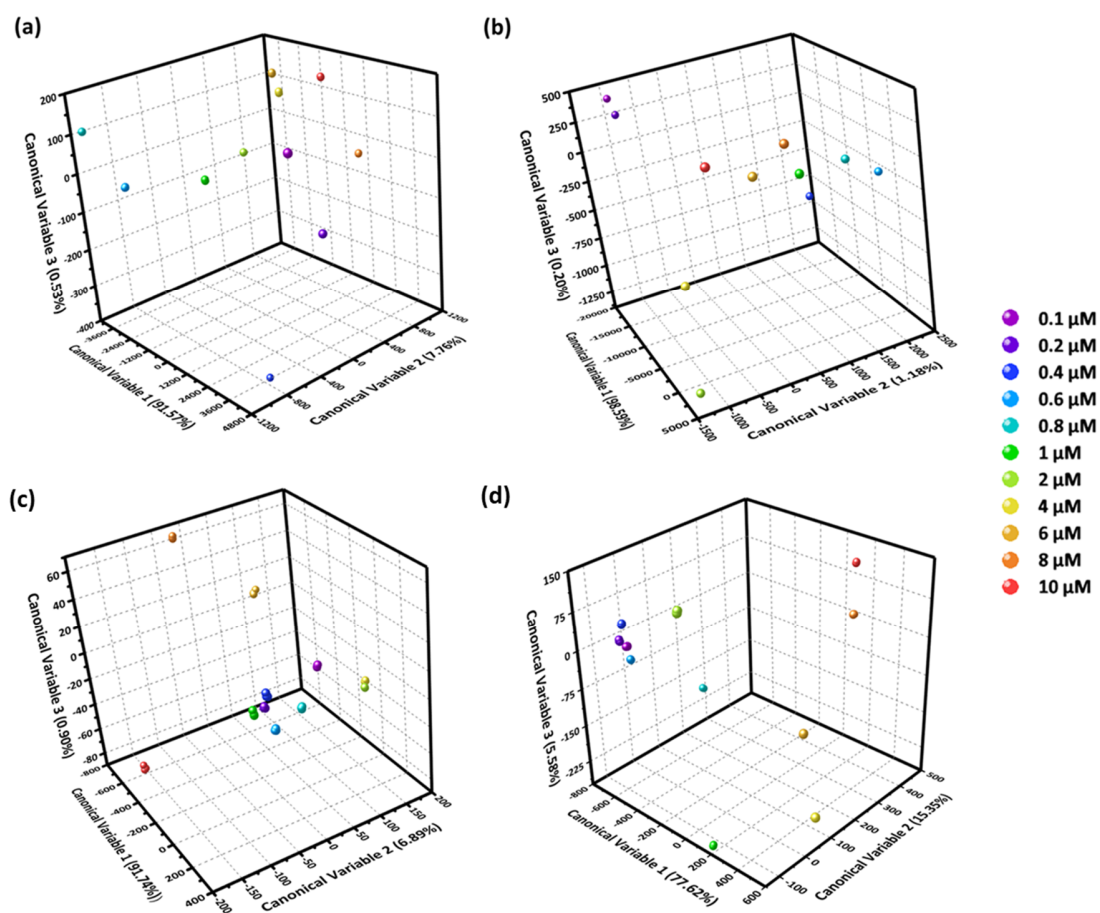

**Figure S9.** Three-dimensional (3D) score plot of PCA-LDA for discrimination between different concentration (0.1-10.0  $\mu\text{M}$ ).

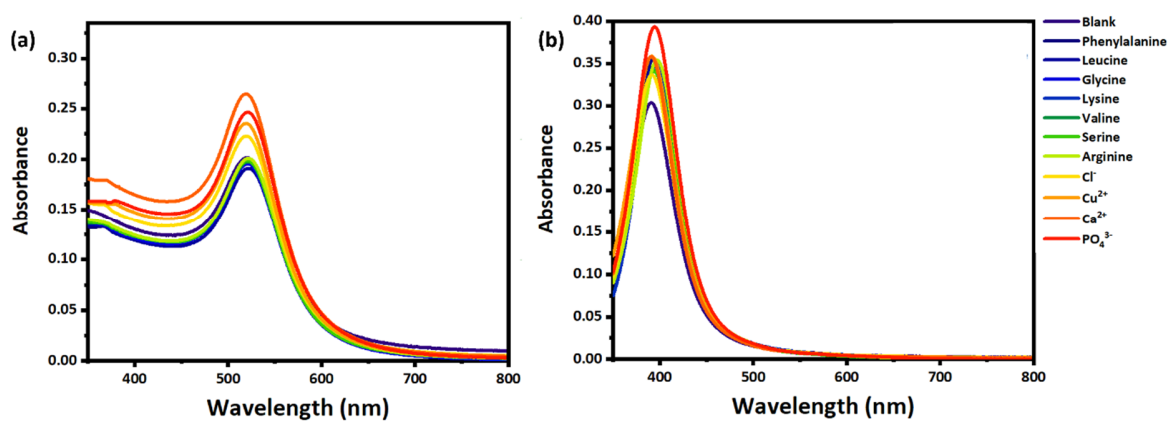

**Figure S10.** The absorption spectra of (a) AuNPs and (b) AgNPs in the presence of different amino acid and ions.

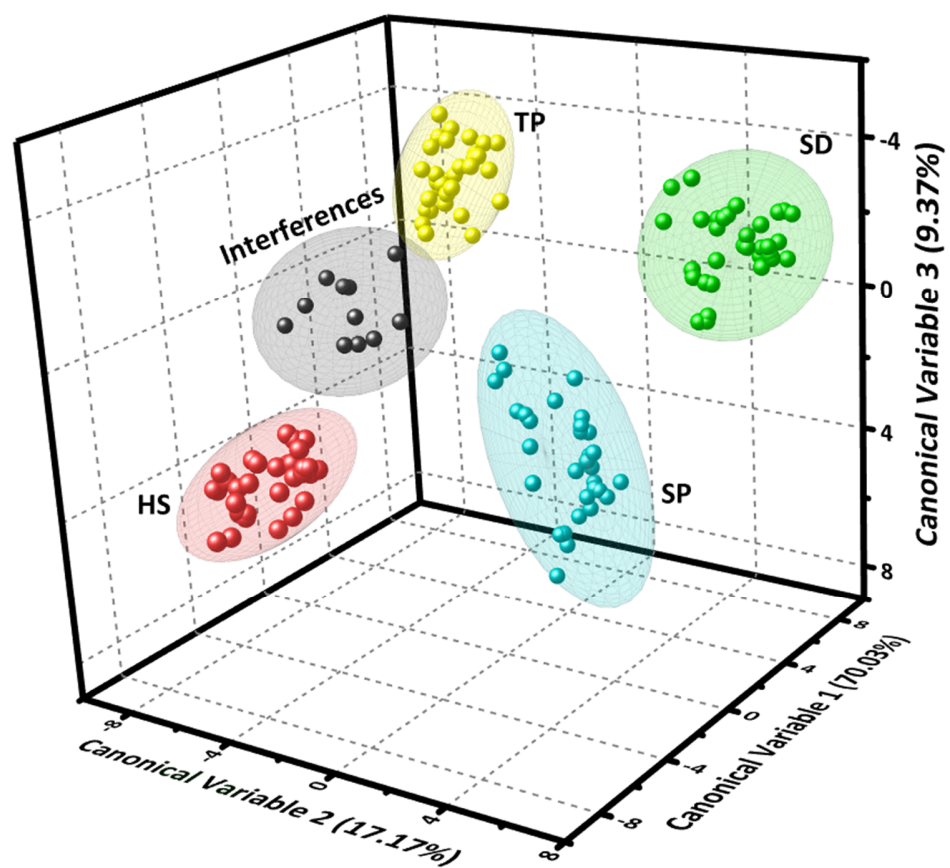

**Figure S11.** 3D score plot of PCA-LDA for identification of BAs in the presence possible interferences.

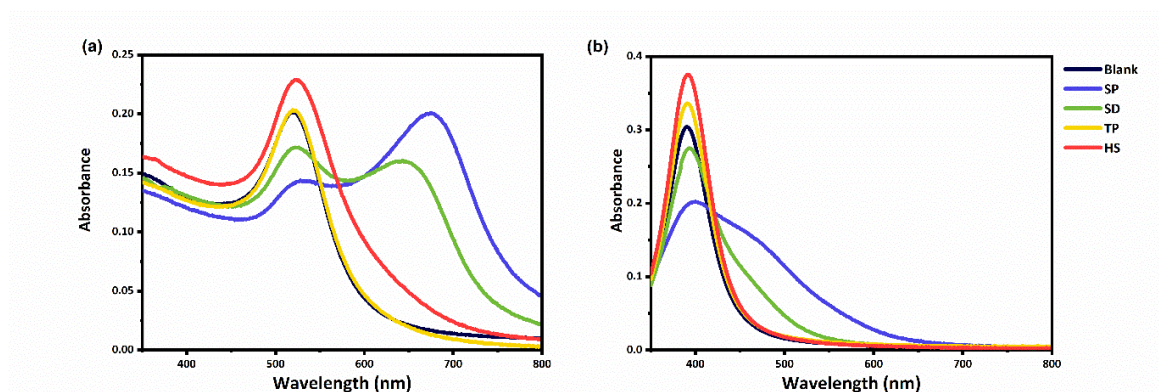

**Figure S12.** The absorption spectra of (a) AuNPs and (b) AgNPs in the presence of meat matrix (blank) and meat contaminated with SP, SD, TP and HS.



**Table S3.** Identification of unknown BAs in meat sample using PCA-LDA (PCA-LDA was performed on the colorimetric responses of the training set and the meat sample (as the test set). The Mahalanobis distance of the unknown samples from the centroid of the training groups was calculated and used for class identification).

| Sample | Mahalanobis distance-square |           |           |           |           | Identified | Accuracy of identification |
|--------|-----------------------------|-----------|-----------|-----------|-----------|------------|----------------------------|
|        | SP                          | SD        | TP        | HS        | Mixture   |            |                            |
| 1      | 47.50067                    | 63.23994  | 118.5535  | 208.15811 | 172.89643 | SP         | Yes                        |
| 2      | 52.40421                    | 63.31959  | 105.6814  | 187.19098 | 157.18552 | SP         | Yes                        |
| 3      | 45.9406                     | 72.51988  | 135.697   | 234.86279 | 197.93355 | SP         | Yes                        |
| 4      | 126.04729                   | 78.52219  | 158.53261 | 162.00655 | 139.82409 | SD         | Yes                        |
| 5      | 152.15811                   | 93.48668  | 157.94727 | 168.32184 | 172.59615 | SD         | Yes                        |
| 6      | 125.36516                   | 108.26037 | 134.8782  | 156.70104 | 159.01085 | SD         | Yes                        |
| 7      | 75.52525                    | 104.73279 | 13.03061  | 120.89905 | 157.65675 | TP         | Yes                        |
| 8      | 83.35536                    | 111.94516 | 6.92949   | 149.2826  | 168.21905 | TP         | Yes                        |
| 9      | 79.83879                    | 108.52752 | 8.73245   | 130.72524 | 156.22293 | TP         | Yes                        |
| 10     | 187.38392                   | 167.27084 | 169.54067 | 29.76728  | 61.7933   | HS         | Yes                        |
| 11     | 181.86381                   | 172.87234 | 166.20817 | 32.67613  | 73.01     | HS         | Yes                        |
| 12     | 194.82008                   | 169.52054 | 110.0658  | 16.77327  | 113.76953 | HS         | Yes                        |

## References

1. Rawat, K.A., et al., *Microwave assisted synthesis of tyrosine protected gold nanoparticles for dual (colorimetric and fluorimetric) detection of spermine and spermidine in biological samples*. Biosensors and Bioelectronics, 2017. **88**: p. 71-77.
2. El-Nour, K., et al., *Gold nanoparticles as a direct and rapid sensor for sensitive analytical detection of biogenic amines*. Nanoscale research letters, 2017. **12**: p. 1-11.
3. Lapenna, A., et al., *"Naked" gold nanoparticles as colorimetric reporters for biogenic amine detection*. Colloids and Surfaces A: Physicochemical and Engineering Aspects, 2020. **600**: p. 124903.
4. Li, H., et al., *Colorimetric detection of food freshness based on amine-responsive dopamine polymerization on gold nanoparticles*. Talanta, 2021. **234**: p. 122706.
5. Wang, J., et al., *Selective colorimetric analysis of spermine based on the cross-linking aggregation of gold nanoparticles chain assembly*. Talanta, 2017. **167**: p. 193-200.
6. Tan, X., et al., *Colorimetric sensing towards spermine based on supramolecular pillar [5] arene reduced and stabilized gold nanoparticles*. Spectrochimica Acta Part A: Molecular and Biomolecular Spectroscopy, 2019. **221**: p. 117176.

7. Jornet-Martínez, N., et al., *Sensitive and selective plasmonic assay for spermine as biomarker in human urine*. *Analytical chemistry*, 2014. **86**(3): p. 1347-1351.
8. Kailasa, S.K., et al., *Independent spectral characteristics of functionalized silver nanoparticles for colorimetric assay of arginine and spermine in biofluids*. *New Journal of Chemistry*, 2019. **43**(43): p. 17069-17077.
9. Orouji, A., et al., *Providing multicolor plasmonic patterns with Au@ Ag core-shell nanostructures for visual discrimination of biogenic amines*. *ACS Applied Materials & Interfaces*, 2021. **13**(17): p. 20865-20874.
